# Supplementary material
Source: publisher figshare collection journal article supplement (https://sage.figshare.com/ndownloader/files/14770967)
Supplement: Supplementary file 1 [file 14770967]

Supplementary material:

Multi-disciplinary Rheumatoid Arthritis Clinic Survey

| No. | Question                                                          | Strongly disagree | Disagree | Neutral | Agree | Strongly agree |
|-----|-------------------------------------------------------------------|-------------------|----------|---------|-------|----------------|
|     |                                                                   | 1                 | 2        | 3       | 4     | 5              |
| 1   | I am more aware of my condition and medication adverse effects.   |                   |          |         |       |                |
| 2   | I am more likely to adhere to my medication treatment.            |                   |          |         |       |                |
| 3   | I am willing to come back for follow up at the pharmacist clinic. |                   |          |         |       |                |
| 4   | The information provided is clear.                                |                   |          |         |       |                |
| 5   | I am satisfied with the service provided at the Pharmacist-       |                   |          |         |       |                |

|  |                                 |  |  |  |  |  |
|--|---------------------------------|--|--|--|--|--|
|  | managed<br>Rheumatology Clinic. |  |  |  |  |  |
|--|---------------------------------|--|--|--|--|--|
